# Supplementary material for: MarineMetagenomeDB: a public repository for curated and standardized metadata for marine metagenomes
Source: Environ Microbiome. 2022 Nov 18;17:57. doi: 10.1186/s40793-022-00449-7 (PMC9675116; doi:10.1186/s40793-022-00449-7)
Supplement: Supplementary file 3 — Additional file 3. Table S3: Attributes chosen to represent different synonyms from SRAdb’s ‘sample_attribute’. [file 40793_2022_449_MOESM3_ESM.xlsx]

## Sheet: Sheet1
Table S3: Attributes chosen to represent different synonyms from SRAdb’s 'sample_attribute'
MarMDB Attribute	Synonyms
collection_date	collection_date, collection date, collectiondate, Collection date, date_collected
coordinates	lat_lon, georaphic location (longitude), geographic location (latitude), longitude, latitude, Longitude Start, Latitude Start, Longitude End, Latitude End, geographic location (latitude and longitude), Geographic location (longitude), Geographic location (latitude), Longitude, Latitude, lat_lon (N
location	geographic location (country and/or sea), geographic location (country and/or sea,region), geographic location (country and/or sea, region), geographic location, geographic location (region and locality), Geographic location (country, geo_loc, Sample Location, geo_loc_name, country location, Location, location_one_line
depth	depth, Depth, geographic location (depth), Sample Depth (m), Sample Depth (ft)
pH	ph, pH
Temperature	temp, temperature, temperature_C
Salinity	Salinity Sensor, salinity, Salinity (PSU), samp_salinity, samp salinity
