# Supplementary material for: MarineMetagenomeDB: a public repository for curated and standardized metadata for marine metagenomes
Source: Environ Microbiome. 2022 Nov 18;17:57. doi: 10.1186/s40793-022-00449-7 (PMC9675116; doi:10.1186/s40793-022-00449-7)
Supplement: Supplementary file 7 — Additional file 7. Table S7: Packages and their versions used for the WebApp. [file 40793_2022_449_MOESM7_ESM.xlsx]

## Sheet: Transformed by Data.Page
Table S7: Complete list of the packages and versions used for building the webapp
Package	Version	_Source	Repository	Hash	RemoteType	RemoteHost	RemoteRepo	RemoteUsername	RemoteRef	RemoteSha
R	3.6.3		CRAN
BH	1.72.0-3	Repository	CRAN	8f9ce74c6417d61f0782cbae5fd2b7b0
DT	0.15	Repository	CRAN	85738c69035e67ec4b484a5e02640ef6
MASS	7.3-51.5	Repository	CRAN	9efe80472b21189ebab1b74169808c26
Matrix	1.2-18	Repository	CRAN	08588806cba69f04797dab50627428ed
R6	2.4.1	Repository	CRAN	292b54f8f4b94669b08f94e5acce6be2
RColorBrewer	1.1-2	Repository	CRAN	e031418365a7f7a766181ab5a41a5716
Rcpp	1.0.5	Repository	CRAN	125dc7a0ed375eb68c0ce533b48d291f
askpass	1.1	Repository	CRAN	e8a22846fff485f0be3770c2da758713
assertthat	0.2.1	Repository	CRAN	50c838a310445e954bc13f26f26a6ecf
backports	1.1.9	Repository	CRAN	b29e2d989dfb2e71ca3fd7d5bb1c0d58
base64enc	0.1-3	Repository	CRAN	543776ae6848fde2f48ff3816d0628bc
brew	1.0-6	Repository	CRAN	92a5f887f9ae3035ac7afde22ba73ee9
callr	3.4.4	Repository	CRAN	e56fe17ffeddfdcfcef40981e41e1c40
cli	2.0.2	Repository	CRAN	ff0becff7bfdfe3f75d29aff8f3172dd
clipr	0.7.0	Repository	CRAN	08cf4045c149a0f0eaf405324c7495bd
colorspace	1.4-1	Repository	CRAN	6b436e95723d1f0e861224dd9b094dfb
commonmark	1.7	Repository	CRAN	0f22be39ec1d141fd03683c06f3a6e67
covr	3.5.0	Repository	CRAN	cbc6df1ef6ee576f844f973c1fc04ab4
cpp11	0.2.1	Repository	CRAN	c4c83167f43ca762a9fa998d4fead3ae
crayon	1.3.4	Repository	CRAN	0d57bc8e27b7ba9e45dba825ebc0de6b
crosstalk	1.1.0.1	Repository	CRAN	ae55f5d7c02f0ab43c58dd050694f2b4
curl	4.3	Repository	CRAN	2b7d10581cc730804e9ed178c8374bd6
data.table	1.13.0	Repository	CRAN	06d5863292e2e8ffbb063ce34e77bb2a
desc	1.2.0	Repository	CRAN	6c8fe8fa26a23b79949375d372c7b395
devtools	2.3.1	Repository	CRAN	271df6a328617c64149283e98b1cd8da
digest	0.6.25	Repository	CRAN	f697db7d92b7028c4b3436e9603fb636
dplyr	1.0.2	Repository	CRAN	d0509913b27ea898189ee664b6030dc2
ellipsis	0.3.1	Repository	CRAN	fd2844b3a43ae2d27e70ece2df1b4e2a
evaluate	0.14	Repository	CRAN	ec8ca05cffcc70569eaaad8469d2a3a7
fansi	0.4.1	Repository	CRAN	7fce217eaaf8016e72065e85c73027b5
farver	2.0.3	Repository	CRAN	dad6793a5a1f73c8e91f1a1e3e834b05
fastmap	1.0.1	Repository	CRAN	83ab58a0518afe3d17e41da01af13b60
foreign	0.8-75	Repository	CRAN	9a7efaa7320b9f327a904d1e615b0b46
fs	1.5.0	Repository	CRAN	44594a07a42e5f91fac9f93fda6d0109
generics	0.0.2	Repository	CRAN	b8cff1d1391fd1ad8b65877f4c7f2e53
geoshaper	0.1.0	GitHub		36e6dd53ad62989a78423bf0d152ac9d	github	api.github.com	geoshaper	RedOakStrategic	HEAD	b3fd1b677cc5208edbecc21952b4eba7121c7803
ggplot2	3.3.2	Repository	CRAN	4ded8b439797f7b1693bd3d238d0106b
gh	1.1.0	Repository	CRAN	89ea5998938d1ad55f035c8a86f96b74
git2r	0.27.1	Repository	CRAN	531a82d1beed1f545beb25f4f5945bf7
glue	1.4.2	Repository	CRAN	6efd734b14c6471cfe443345f3e35e29
gridExtra	2.3	Repository	CRAN	7d7f283939f563670a697165b2cf5560
gtable	0.3.0	Repository	CRAN	ac5c6baf7822ce8732b343f14c072c4d
hexbin	1.28.1	Repository	CRAN	3d59212f2814d65dff517e6899813c58
highr	0.8	Repository	CRAN	4dc5bb88961e347a0f4d8aad597cbfac
htmltools	0.5.0	Repository	CRAN	7d651b7131794fe007b1ad6f21aaa401
htmlwidgets	1.5.1	Repository	CRAN	41bace23583fbc25089edae324de2dc3
httpuv	1.5.4	Repository	CRAN	4e6dabb220b006ccdc3b3b5ff993b205
httr	1.4.2	Repository	CRAN	a525aba14184fec243f9eaec62fbed43
ini	0.3.1	Repository	CRAN	6154ec2223172bce8162d4153cda21f7
isoband	0.2.2	Repository	CRAN	6e58bd3d6b3dd82a944cd6f05ade228f
jsonlite	1.7.0	Repository	CRAN	2657f20b9a74c996c602e74ebe540b06
knitr	1.29	Repository	CRAN	e5f4c41c17df8cdf7b0df12117c0d99a
labeling	0.3	Repository	CRAN	73832978c1de350df58108c745ed0e3e
later	1.1.0.1	Repository	CRAN	d0a62b247165aabf397fded504660d8a
lattice	0.20-38	Repository	CRAN	848f8c593fd1050371042d18d152e3d7
lazyeval	0.2.2	Repository	CRAN	d908914ae53b04d4c0c0fd72ecc35370
leaflet	2.0.3	Repository	CRAN	3f3f5e5603fc791dfb77279ad84cc711
leaflet.extras	1.0.0	Repository	CRAN	8dbfc2c4d7ca2660971caf1153ca95c2
leaflet.providers	1.9.0	Repository	CRAN	d3082a7beac4a1aeb96100ff06265d7e
lifecycle	0.2.0	Repository	CRAN	361811f31f71f8a617a9a68bf63f1f42
magrittr	1.5	Repository	CRAN	1bb58822a20301cee84a41678e25d9b7
maptools	1.0-2	Repository	CRAN	1cb5cb7bbab76318944e3794ff2512ae
markdown	1.1	Repository	CRAN	61e4a10781dd00d7d81dd06ca9b94e95
memoise	1.1.0	Repository	CRAN	58baa74e4603fcfb9a94401c58c8f9b1
mgcv	1.8-31	Repository	CRAN	4bb7e0c4f3557583e1e8d3c9ffb8ba5c
mime	0.9	Repository	CRAN	e87a35ec73b157552814869f45a63aa3
munsell	0.5.0	Repository	CRAN	6dfe8bf774944bd5595785e3229d8771
nlme	3.1-144	Repository	CRAN	e80d41932d3cc235ccbbbb9732ae162e
openssl	1.4.2	Repository	CRAN	b3209c62052922b6c629544d94c8fa8a
pillar	1.4.6	Repository	CRAN	bdf26e55ccb7df3e49a490150277f002
pkgbuild	1.1.0	Repository	CRAN	404684bc4e3685007f9720adf13b06c1
pkgconfig	2.0.3	Repository	CRAN	01f28d4278f15c76cddbea05899c5d6f
pkgload	1.1.0	Repository	CRAN	b6b150cd4709e0c0c9b5d51ac4376282
plotly	4.9.2.1	Repository	CRAN	b08edf378e0e38959a6983e3d5902795
png	0.1-7	Repository	CRAN	03b7076c234cb3331288919983326c55
praise	1.0.0	Repository	CRAN	a555924add98c99d2f411e37e7d25e9f
prettyunits	1.1.1	Repository	CRAN	95ef9167b75dde9d2ccc3c7528393e7e
processx	3.4.4	Repository	CRAN	03446ed0b8129916f73676726cb3c48f
promises	1.1.1	Repository	CRAN	a8730dcbdd19f9047774909f0ec214a4
ps	1.3.4	Repository	CRAN	a54a7dfd68124abb2225dbfa9a85c457
purrr	0.3.4	Repository	CRAN	97def703420c8ab10d8f0e6c72101e02
raster	3.3-13	Repository	CRAN	51cfecf7b9518d46b119f92d581616b6
rcmdcheck	1.3.3	Repository	CRAN	ed95895886dab6d2a584da45503555da
rematch2	2.1.2	Repository	CRAN	76c9e04c712a05848ae7a23d2f170a40
remotes	2.2.0	Repository	CRAN	430a0908aee75b1fcba0e62857cab0ce
renv	0.12.0	Repository	CRAN	7340c71f46a0fd16506cfa804e224e44
rex	1.2.0	Repository	CRAN	093584b944440c5cd07a696b3c8e0e4c
rlang	0.4.7	Repository	CRAN	c06d2a6887f4b414f8e927afd9ee976a
rmarkdown	2.3	Repository	CRAN	202260e1b2c410edc086d5b8f1ed946e
roxygen2	7.1.1	Repository	CRAN	fcd94e00cc409b25d07ca50f7bf339f5
rprojroot	1.3-2	Repository	CRAN	f6a407ae5dd21f6f80a6708bbb6eb3ae
rstudioapi	0.11	Repository	CRAN	33a5b27a03da82ac4b1d43268f80088a
rversions	2.0.2	Repository	CRAN	0ec41191f744d0f5afad8c6f35cc36e4
scales	1.1.1	Repository	CRAN	6f76f71042411426ec8df6c54f34e6dd
sessioninfo	1.1.1	Repository	CRAN	308013098befe37484df72c39cf90d6e
shiny	1.5.0	Repository	CRAN	ee4ed72d7a5047d9e73cf922ad66e9c9
shinyBS	0.61	Repository	CRAN	f895dafd39733c4a70d425f605a832e7
shinyWidgets	0.5.3	Repository	CRAN	9b31c168255d8f0b99fc434b58f1ccba
shinyjs	2.0.0	Repository	CRAN	9ddfc91d4280eaa34c2103951538976f
shinythemes	1.1.2	Repository	CRAN	8f047210d7d68ea4860a3c0d8cced272
sourcetools	0.1.7	Repository	CRAN	947e4e02a79effa5d512473e10f41797
sp	1.4-2	Repository	CRAN	3290eebc34ba4df5e213878d54c1e623
stringi	1.5.3	Repository	CRAN	a063ebea753c92910a4cca7b18bc1f05
stringr	1.4.0	Repository	CRAN	0759e6b6c0957edb1311028a49a35e76
sys	3.4	Repository	CRAN	b227d13e29222b4574486cfcbde077fa
testthat	2.3.2	Repository	CRAN	0829b987b8961fb07f3b1b64a2fbc495
tibble	3.0.3	Repository	CRAN	08bd36bd34b20d4f7971d49e81deaab0
tidyr	1.1.2	Repository	CRAN	c40b2d5824d829190f4b825f4496dfae
tidyselect	1.1.0	Repository	CRAN	6ea435c354e8448819627cf686f66e0a
tinytex	0.25	Repository	CRAN	a4b9662282097d1033c60420dcb83350
usethis	1.6.1	Repository	CRAN	e1985f5a9985fea2e338fa7eb99018ca
utf8	1.1.4	Repository	CRAN	4a5081acfb7b81a572e4384a7aaf2af1
vctrs	0.3.4	Repository	CRAN	0bc90078aeee42f2520b1d0a33bd6758
viridis	0.5.1	Repository	CRAN	6f6b49e5b3b5ee5a6d0c28bf1b4b9eb3
viridisLite	0.3.0	Repository	CRAN	ce4f6271baa94776db692f1cb2055bee
waiter	0.1.2	Repository	CRAN	040479b66f4ed83653ccb8d136f221a6
whisker	0.4	Repository	CRAN	ca970b96d894e90397ed20637a0c1bbe
withr	2.2.0	Repository	CRAN	ecd17882a0b4419545691e095b74ee89
xfun	0.17	Repository	CRAN	5016afba2a931ac92bbb3c6feb03d2c8
xml2	1.3.2	Repository	CRAN	d4d71a75dd3ea9eb5fa28cc21f9585e2
xopen	1.0.0	Repository	CRAN	6c85f015dee9cc7710ddd20f86881f58
xtable	1.8-4	Repository	CRAN	b8acdf8af494d9ec19ccb2481a9b11c2
yaml	2.2.1	Repository	CRAN	2826c5d9efb0a88f657c7a679c7106db
